# Supplementary material for: Association Between Women’s Exposure to Intimate Partner Violence and Self-reported Health Outcomes in New Zealand
Source: PubMed Central journal article supplement — JAMA Netw Open. 2023 Mar 3;6(3):e231311. doi: 10.1001/jamanetworkopen.2023.1311 (PMC9984970; doi:10.1001/jamanetworkopen.2023.1311), 2023-03-03
Supplement: jamanetwopen-e231311-s002.pdf [file jamanetwopen-e231311-s002.pdf]

## Data Sharing Statement

Mellar. Association Between Women's Exposure to Intimate Partner Violence and Self-reported Health Outcomes in New Zealand. *JAMA Netw Open*. Published March 03, 2023.  
doi:10.1001/jamanetworkopen.2023.1311

### Data

**Data available:** No
